# Supplementary material for: Yoghurt consumption is associated with changes in the composition of the human gut microbiome and metabolome
Source: BMC Microbiol. 2022 Feb 3;22:39. doi: 10.1186/s12866-021-02364-2 (PMC8812230; doi:10.1186/s12866-021-02364-2)
Supplement: Supplementary file 2 — Additional file 2: Supplementary Table 1. Description of the LifeLines-DEEP cohort. [file 12866_2021_2364_MOESM2_ESM.xlsx]

## Sheet: Sheet1
	Yoghurt Consumers	Non-Consumers
n	1010	93
Gender (% Female)	0.585	0.581
BMI	25.29 ± 4.11	24.58 ± 4.23
Age	44.88 ± 13.40	43.11 ± 12.44
