# Supplementary material for: Yoghurt consumption is associated with changes in the composition of the human gut microbiome and metabolome
Source: BMC Microbiol. 2022 Feb 3;22:39. doi: 10.1186/s12866-021-02364-2 (PMC8812230; doi:10.1186/s12866-021-02364-2)
Supplement: Supplementary file 3 — Additional file 3: Supplementary Table 2. Association between yoghurt consumption gut microbiota alpha diversity. Results were obtained by fitting linear mixed effect model where alpha diversity metrics generated from 16S rRNA and shotgun metagenomics data from two cohort were used as a response to level of yoghurt consumption and BMI, sex and age, as well as HEI and family structure for TwinsUK only, were used as covariates. [file 12866_2021_2364_MOESM3_ESM.xlsx]

## Sheet: Sheet1
Metrix	eff	P	SE	n
Lachnospiraceae_UCG.001	0.0433444	1.97e-06	0.00899257	1457
Phascolarctobacterium	-0.0161831	0.107701	0.0100494	1457
Acidaminococcaceae	-0.0144639	0.130029	0.0095436	1457
Prevotellaceae_NK3B31_group	-0.00207683	0.684227	0.00510587	1457
Akkermansia	0.00113162	0.897116	0.00873168	1457
Akkermansiaceae	0.000851206	0.921667	0.00863658	1457
Verrucomicrobia	0.00125797	0.883256	0.00854828	1457
Anaeroplasma	0.0162346	0.0049471	0.00576356	1457
Anaeroplasmataceae	0.0159965	0.00507599	0.00569583	1457
Oscillibacter	0.000832737	0.887053	0.00585885	1457
Streptococcus	0.0374599	5.45e-09	0.00637398	1457
Streptococcaceae	0.0361073	1.03e-08	0.00626049	1457
Lachnospira	0.0119251	0.0506741	0.00609456	1457
Dialister	0.0184704	0.0715317	0.0102362	1457
Cyanobacteria	0.0127515	0.0715255	0.00706662	1457
Ruminococcaceae_UCG.013	0.0077353	0.151228	0.00537223	1457
Roseburia	0.0063573	0.229247	0.00528393	1457
Enterococcaceae	0.00546805	0.2302	0.00455403	1457
Synergistetes	-0.00542884	0.336983	0.00564698	1457
Succinivibrionaceae	-0.00137411	0.584751	0.00250777	1457
Prevotella_9	0.000532146	0.955204	0.00947284	1457
Coprobacter	0.000131642	0.986068	0.0075012	1457
Family_XIII_AD3011_group	0.0125097	0.0172306	0.00524508	1457
Butyricicoccus	-0.0151186	0.00708844	0.00560618	1457
Veillonellaceae	0.0167393	0.0449144	0.00833606	1457
Ruminiclostridium_5	0.00710012	0.0820359	0.0040795	1457
Terrisporobacter	0.00964498	0.230396	0.00803311	1457
Succinivibrio	-0.00186549	0.414293	0.00228486	1457
Lactobacillaceae	0.0177009	0.00199775	0.00571348	1457
Peptostreptococcaceae	0.00952487	0.143022	0.00649693	1457
Lachnospiraceae	0.000363547	0.918829	0.00356474	1457
Ruminococcaceae_NK4A214_group	0.0322446	1.36e-05	0.00738272	1457
Klebsiella	0.0120892	0.0285104	0.00549918	1457
Intestinibacter	0.0100226	0.215351	0.00808282	1457
Clostridiales_vadinBB60_group	0.00671765	0.359723	0.00733214	1457
Prevotellaceae	-0.000328937	0.973939	0.0100542	1457
Christensenellaceae	0.0246582	5.5e-05	0.00609099	1457
Ruminococcaceae_UCG.005	0.0233906	0.000204555	0.00628204	1457
Ruminococcus_1	0.0231428	0.000381758	0.0065	1457
Ruminococcaceae_UCG.003	0.0249481	0.00115582	0.00765594	1457
Ruminococcaceae_UCG.002	0.0174772	0.00248531	0.00575958	1457
Lachnoclostridium	-0.016378	0.00283901	0.00547509	1457
Lentisphaerae	0.0181323	0.00386738	0.00625897	1457
Ruminococcaceae_UCG.014	0.0240098	0.00510826	0.00856263	1457
Erysipelotrichaceae_UCG.003	0.0137376	0.0327289	0.00642018	1457
Erysipelatoclostridium	-0.0158674	0.0339133	0.00747028	1457
Pasteurellaceae	0.0142938	0.061541	0.0076283	1457
Haemophilus	0.0137602	0.0724795	0.00764461	1457
Erysipelotrichaceae	0.00481568	0.164038	0.00345576	1457
Family_XIII	0.00633346	0.167045	0.00457746	1457
Anaerostipes	0.00580326	0.247569	0.00501762	1457
Holdemanella	0.0102891	0.31969	0.0103315	1457
Alloprevotella	0.00583555	0.335074	0.00604234	1457
CAG.56	0.0079239	0.365562	0.00874929	1457
Desulfovibrionaceae	-0.00628609	0.362339	0.00689798	1457
Fusicatenibacter	-0.00449311	0.462281	0.00610515	1457
UBA1819	-0.00434336	0.454782	0.00578084	1457
Tyzzerella_4	-0.00445504	0.457395	0.00598944	1457
Agathobacter	0.00301176	0.595175	0.0056576	1457
Alistipes	-0.00232651	0.590706	0.00431907	1457
Rikenellaceae	-0.00225847	0.583734	0.00411465	1457
Barnesiellaceae	0.00297923	0.690366	0.00744089	1457
Euryarchaeota	0.00245031	0.781296	0.00880458	1457
Methanobrevibacter	0.00162035	0.856187	0.00891815	1457
Methanobacteriaceae	0.00168365	0.848989	0.00881774	1457
Ruminococcaceae_UCG.010	0.0350323	3.02e-05	0.00836668	1457
Christensenellaceae_R.7_group	0.0274444	4.01e-05	0.00665635	1457
Lachnospiraceae_FCS020_group	0.0263579	0.000877801	0.00790152	1457
Coprococcus_1	0.024478	0.00125146	0.00756819	1457
Peptococcaceae	0.0254246	0.00111894	0.0077854	1457
Tenericutes	0.032153	0.00131785	0.00998868	1457
Flavonifractor	-0.019843	0.00812875	0.00748199	1457
Marvinbryantia	0.02156	0.0103754	0.00840201	1457
Coprococcus_2	0.0264557	0.0114523	0.0104445	1457
Coprococcus_3	0.0137899	0.0325783	0.00644645	1457
Bacteroidetes	-0.00721047	0.0461178	0.00361025	1457
Bifidobacterium	0.0134364	0.0494775	0.00683503	1457
Bifidobacteriaceae	0.0131405	0.0558184	0.00686651	1457
Bacteroidaceae	-0.00657625	0.0598233	0.00348844	1457
Ruminococcaceae	0.00658888	0.0586576	0.00348262	1457
Bacteroides	-0.0060257	0.079615	0.00343217	1457
Desulfovibrio	0.0186902	0.0814555	0.0107077	1457
Bilophila	-0.0110156	0.0925303	0.00653558	1457
Firmicutes	0.00451489	0.135141	0.00301755	1457
Lachnospiraceae_UCG.004	0.0136562	0.137675	0.00918408	1457
Clostridiaceae_1	0.0102979	0.142345	0.00701326	1457
Veillonella	0.010599	0.150449	0.00735256	1457
Blautia	-0.00575135	0.170575	0.00419304	1457
Clostridium_sensu_stricto_1	0.00988471	0.168655	0.00717623	1457
Butyrivibrio	0.00935392	0.180808	0.00698723	1457
Epsilonbacteraeota	-0.0031154	0.292015	0.00295186	1457
Dorea	0.00409931	0.361877	0.00449483	1457
Rikenellaceae_RC9_gut_group	0.00682689	0.369759	0.00760558	1457
Shuttleworthia	-0.00374415	0.400532	0.00444822	1457
Proteobacteria	0.00334355	0.427441	0.00421158	1457
Ruminiclostridium_6	0.00613555	0.460346	0.00830826	1457
Romboutsia	0.0051742	0.441867	0.00672425	1457
Catenibacterium	0.00506048	0.456037	0.00678616	1457
Escherichia.Shigella	-0.00591345	0.476925	0.00830685	1457
Paraprevotella	0.00674512	0.512569	0.0102817	1457
Prevotella_7	-0.003987	0.540193	0.00650494	1457
Lachnospiraceae_NK4A136_group	0.00379214	0.548782	0.00632333	1457
Subdoligranulum	0.00291863	0.585407	0.00534948	1457
Acidaminococcus	-0.00265576	0.644492	0.00574991	1457
Ruminiclostridium_9	-0.00254364	0.649472	0.00559137	1457
Odoribacter	0.00236786	0.692563	0.00598789	1457
Enterobacteriaceae	0.00329026	0.685232	0.00811103	1457
Faecalibacterium	0.00164401	0.741028	0.00497051	1457
Tannerellaceae	-0.00212474	0.744923	0.0065171	1457
Coriobacteriales_Incertae_Sedis	0.00250581	0.74699	0.00776612	1457
Parabacteroides	-0.00183845	0.778993	0.00653751	1457
Megasphaera	0.000916548	0.803281	0.00367565	1457
Ruminococcus_2	-0.00133887	0.853342	0.00721627	1457
Parasutterella	0.00127138	0.874212	0.00802458	1457
Lachnospiraceae_UCG.010	0.000708908	0.921428	0.00718568	1457
Turicibacter	0.000709551	0.937829	0.00908841	1457
Coriobacteriaceae	-0.00110005	0.894004	0.00825295	1457
Fusobacteria	0.000582309	0.896658	0.00448326	1457
Collinsella	-0.000688012	0.933703	0.00826748	1457
Lachnospiraceae_AC2044_group	0.00748828	0.316143	0.00746706	1457
Sutterella	0.00113483	0.902027	0.00921099	1457
CAG.352	0.0157564	0.0329398	0.00734681	1457
Barnesiella	0.00651372	0.442791	0.00847119	1457
Actinobacteria	0.00313832	0.501172	0.00466095	1457
Citrobacter	-0.000258793	0.939452	0.00340665	1457
Marinifilaceae	0.00593537	0.310132	0.00584642	1457
Eggerthellaceae	0.00899776	0.101355	0.00548699	1457
Muribaculaceae	0.0100201	0.229256	0.00831688	1457
Lachnospiraceae_ND3007_group	0.00732169	0.379749	0.00833057	1457
Burkholderiaceae	0.00290277	0.620467	0.00586067	1457

## Sheet: Sheet2
Cohort	Sequencing	Metrics	Effect size	SE	P	n
TwinsUK	16S rRNA	Richness	5.02419	1.95326	0.0102765	1441
		Shannon	0.0490859	0.0168418	0.00361394	1441
		Fisher	0.773886	0.265345	0.00361063	1441
		Simpson	0.00285351	0.00174294	0.101811	1441
	Shotgun Metagenomics	Richness	0.0488218	0.261137	0.852002	524
		Shannon	-0.0042404	0.0396128	0.914771	524
		Fisher	0.0484402	0.189684	0.799267	524
		Simpson	-0.00232714	0.00688828	0.735498	524
