# Supplementary material for: Yoghurt consumption is associated with changes in the composition of the human gut microbiome and metabolome
Source: BMC Microbiol. 2022 Feb 3;22:39. doi: 10.1186/s12866-021-02364-2 (PMC8812230; doi:10.1186/s12866-021-02364-2)
Supplement: Supplementary file 4 — Additional file 4: Supplementary Table 3. Association between yoghurt consumption and taxa (16S rRNA sequencing). Results were obtained by fitting linear mixed effect model where taxa were used as a response to level of yoghurt consumption and BMI, sex, age, HEI and family structure were used as covariates. [file 12866_2021_2364_MOESM4_ESM.xlsx]

## Sheet: Sheet2
Level	Taxa	Effect size	SE	P	n
Genus	Streptococcus	0.0374599	0.00637398	5.45e-09	1457
	Lachnospiraceae_UCG.001	0.0433444	0.00899257	1.97e-06	1457
	Ruminococcaceae_NK4A214_group	0.0322446	0.00738272	1.36e-05	1457
	Ruminococcaceae_UCG.010	0.0350323	0.00836668	3.02e-05	1457
	Christensenellaceae_R.7_group	0.0274444	0.00665635	4.01e-05	1457
	Ruminococcaceae_UCG.005	0.0233906	0.00628204	0.000204555	1457
	Ruminococcus_1	0.0231428	0.0065	0.000381758	1457
	Lachnospiraceae_FCS020_group	0.0263579	0.00790152	0.000877801	1457
	Ruminococcaceae_UCG.003	0.0249481	0.00765594	0.00115582	1457
	Coprococcus_1	0.024478	0.00756819	0.00125146	1457
	Ruminococcaceae_UCG.002	0.0174772	0.00575958	0.00248531	1457
	Lachnoclostridium	-0.016378	0.00547509	0.00283901	1457
	Anaeroplasma	0.0162346	0.00576356	0.0049471	1457
	Ruminococcaceae_UCG.014	0.0240098	0.00856263	0.00510826	1457
	Butyricicoccus	-0.0151186	0.00560618	0.00708844	1457
	Flavonifractor	-0.019843	0.00748199	0.00812875	1457
	Marvinbryantia	0.02156	0.00840201	0.0103754	1457
	Coprococcus_2	0.0264557	0.0104445	0.0114523	1457
	Family_XIII_AD3011_group	0.0125097	0.00524508	0.0172306	1457
	Klebsiella	0.0120892	0.00549918	0.0285104	1457
	Coprococcus_3	0.0137899	0.00644645	0.0325783	1457
	Erysipelotrichaceae_UCG.003	0.0137376	0.00642018	0.0327289	1457
	CAG.352	0.0157564	0.00734681	0.0329398	1457
	Erysipelatoclostridium	-0.0158674	0.00747028	0.0339133	1457
	Bifidobacterium	0.0134364	0.00683503	0.0494775	1457
	Lachnospira	0.0119251	0.00609456	0.0506741	1457
	Dialister	0.0184704	0.0102362	0.0715317	1457
	Haemophilus	0.0137602	0.00764461	0.0724795	1457
	Bacteroides	-0.0060257	0.00343217	0.079615	1457
	Desulfovibrio	0.0186902	0.0107077	0.0814555	1457
	Ruminiclostridium_5	0.00710012	0.0040795	0.0820359	1457
	Bilophila	-0.0110156	0.00653558	0.0925303	1457
	Phascolarctobacterium	-0.0161831	0.0100494	0.107701	1457
	Lachnospiraceae_UCG.004	0.0136562	0.00918408	0.137675	1457
	Clostridiaceae_1	0.0102979	0.00701326	0.142345	1457
	Veillonella	0.010599	0.00735256	0.150449	1457
	Ruminococcaceae_UCG.013	0.0077353	0.00537223	0.151228	1457
	Blautia	-0.00575135	0.00419304	0.170575	1457
	Butyrivibrio	0.00935392	0.00698723	0.180808	1457
	Intestinibacter	0.0100226	0.00808282	0.215351	1457
	Roseburia	0.0063573	0.00528393	0.229247	1457
	Terrisporobacter	0.00964498	0.00803311	0.230396	1457
	Anaerostipes	0.00580326	0.00501762	0.247569	1457
	Lachnospiraceae_AC2044_group	0.00748828	0.00746706	0.316143	1457
	Holdemanella	0.0102891	0.0103315	0.31969	1457
	Alloprevotella	0.00583555	0.00604234	0.335074	1457
	Clostridiales_vadinBB60_group	0.00671765	0.00733214	0.359723	1457
	Dorea	0.00409931	0.00449483	0.361877	1457
	Rikenellaceae_RC9_gut_group	0.00682689	0.00760558	0.369759	1457
	Lachnospiraceae_ND3007_group	0.00732169	0.00833057	0.379749	1457
	Shuttleworthia	-0.00374415	0.00444822	0.400532	1457
	Succinivibrio	-0.00186549	0.00228486	0.414293	1457
	Romboutsia	0.0051742	0.00672425	0.441867	1457
	Barnesiella	0.00651372	0.00847119	0.442791	1457
	Catenibacterium	0.00506048	0.00678616	0.456037	1457
	Tyzzerella_4	-0.00445504	0.00598944	0.457395	1457
	Ruminiclostridium_6	0.00613555	0.00830826	0.460346	1457
	Fusicatenibacter	-0.00449311	0.00610515	0.462281	1457
	Escherichia.Shigella	-0.00591345	0.00830685	0.476925	1457
	Paraprevotella	0.00674512	0.0102817	0.512569	1457
	Prevotella_7	-0.003987	0.00650494	0.540193	1457
	Lachnospiraceae_NK4A136_group	0.00379214	0.00632333	0.548782	1457
	Subdoligranulum	0.00291863	0.00534948	0.585407	1457
	Alistipes	-0.00232651	0.00431907	0.590706	1457
	Agathobacter	0.00301176	0.0056576	0.595175	1457
	Acidaminococcus	-0.00265576	0.00574991	0.644492	1457
	Ruminiclostridium_9	-0.00254364	0.00559137	0.649472	1457
	Prevotellaceae_NK3B31_group	-0.00207683	0.00510587	0.684227	1457
	Odoribacter	0.00236786	0.00598789	0.692563	1457
	Faecalibacterium	0.00164401	0.00497051	0.741028	1457
	Coriobacteriales_Incertae_Sedis	0.00250581	0.00776612	0.74699	1457
	Parabacteroides	-0.00183845	0.00653751	0.778993	1457
	Megasphaera	0.000916548	0.00367565	0.803281	1457
	Ruminococcus_2	-0.00133887	0.00721627	0.853342	1457
	Methanobrevibacter	0.00162035	0.00891815	0.856187	1457
	Parasutterella	0.00127138	0.00802458	0.874212	1457
	Oscillibacter	0.000832737	0.00585885	0.887053	1457
	Akkermansia	0.00113162	0.00873168	0.897116	1457
	Sutterella	0.00113483	0.00921099	0.902027	1457
	Lachnospiraceae_UCG.010	0.000708908	0.00718568	0.921428	1457
	Collinsella	-0.000688012	0.00826748	0.933703	1457
	Turicibacter	0.000709551	0.00908841	0.937829	1457
	Citrobacter	-0.000258793	0.00340665	0.939452	1457
	Prevotella_9	0.000532146	0.00947284	0.955204	1457
	Coprobacter	0.000131642	0.0075012	0.986068	1457
