# Supplementary material for: Yoghurt consumption is associated with changes in the composition of the human gut microbiome and metabolome
Source: BMC Microbiol. 2022 Feb 3;22:39. doi: 10.1186/s12866-021-02364-2 (PMC8812230; doi:10.1186/s12866-021-02364-2)
Supplement: Supplementary file 6 — Additional file 6: Supplementary Table 5. Association between dairy fermented bacterial species (B. animalis subsp. lactis and S. thermophilus) and blood and phenotypical parameters associated with yoghurt consumption. Results were obtained by fitting linear mixed effect model where phenotypes and blood parameters were used as a response to species levels and BMI, sex, age, HEI and family structure were used as covariates. [file 12866_2021_2364_MOESM6_ESM.xlsx]

## Sheet: Resulst_Metabo_Bugs
	B. animalis. subsp lactis				S. thermophilus
	beta	SE	P	n	beta	SE	P	n
VFM	-51.4003	74.959	0.493141	473	13.9547	37.5082	0.710072	522
Insulin	-4.97641	20.4233	0.80808	620	0.6679	13.3016	0.959954	692
