# Supplementary material for: Yoghurt consumption is associated with changes in the composition of the human gut microbiome and metabolome
Source: BMC Microbiol. 2022 Feb 3;22:39. doi: 10.1186/s12866-021-02364-2 (PMC8812230; doi:10.1186/s12866-021-02364-2)
Supplement: Supplementary file 8 — Additional file 8: Supplementary Table 7. Association between B. animalis subsp. lactis and faecal metabolites. Results were obtained by fitting linear mixed effect model where metabolites were used as a response to level of yoghurt consumption and BMI, gender, age, HEI and family structure were used as covariates. Only significant results (passing Bonferroni threshold P < 5.88x10−5). [file 12866_2021_2364_MOESM8_ESM.xlsx]

## Sheet: Sheet1
Biochemical	beta	SE	P	n
5alpha-pregnan-3beta,20beta-diol monosulfate (1)	-0.144077	0.0269158	1.63357e-19	66
5-hydroxy-2-indolecarboxylic acid	-0.119771	0.032785	3.85974e-14	45
3-hydroxyoctanoate	0.168045	0.0358237	3.82167e-10	41
5-methyluridine (ribothymidine)	-0.0866806	0.0138571	2.182e-09	292
uridine	-0.0800357	0.0135995	1.70925e-08	303
3-(3-hydroxyphenyl)propionate sulfate	-0.0530011	0.017448	3.97405e-08	49
guanosine	-0.0731979	0.0139997	4.52281e-07	301
inosine	-0.0750422	0.0148495	1.06997e-06	285
ribose	-0.0717814	0.0146676	1.72853e-06	251
nicotinate	-0.0621162	0.013372	5.2588e-06	301
pantothenate (Vitamin B5)	-0.0592258	0.0135976	1.85424e-05	304
arachidonate (20:4n6)	-0.0581247	0.0140678	4.85417e-05	303
linoleoyl ethanolamide	-0.0582244	0.0141034	4.96534e-05	301
